# Supplementary material
Source: publisher site journal article supplement (https://www.dovepress.com/article/441540)
Supplement: Supplementary file 1 [file get_supplementary_file.php]

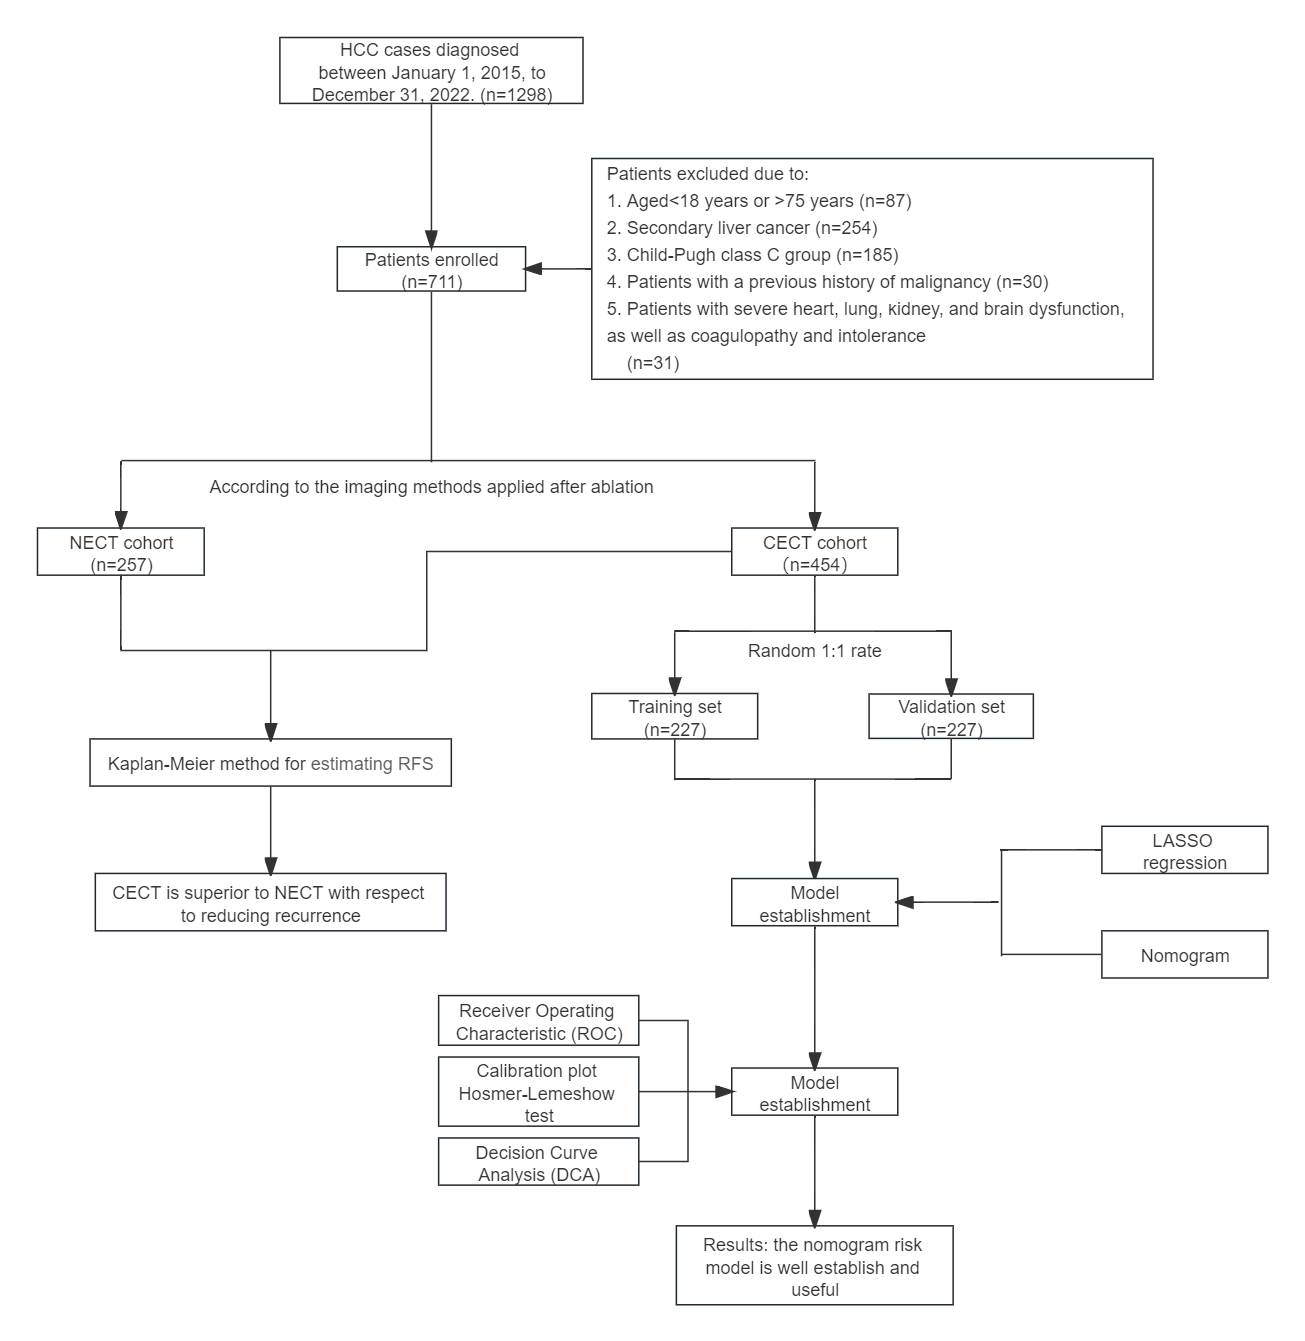


**Figure S1** Flow chart of the patients included in the study.

**Abbreviations:** HCC, hepatocellular carcinoma; CECT, contrast-enhanced computed tomography; NECT, non-enhanced computed tomography; KM, Kaplan-Meier curve; RFS, recurrence-free survival;
